# Supplementary material
Source: HighWire-hosted journal article supplement (http://erj.ersjournals.com/highwire/filestream/113033/field_highwire_adjunct_files/3/Online_Figure_G.pdf)

TB-nNO as a function of age in PCD, CF and HC

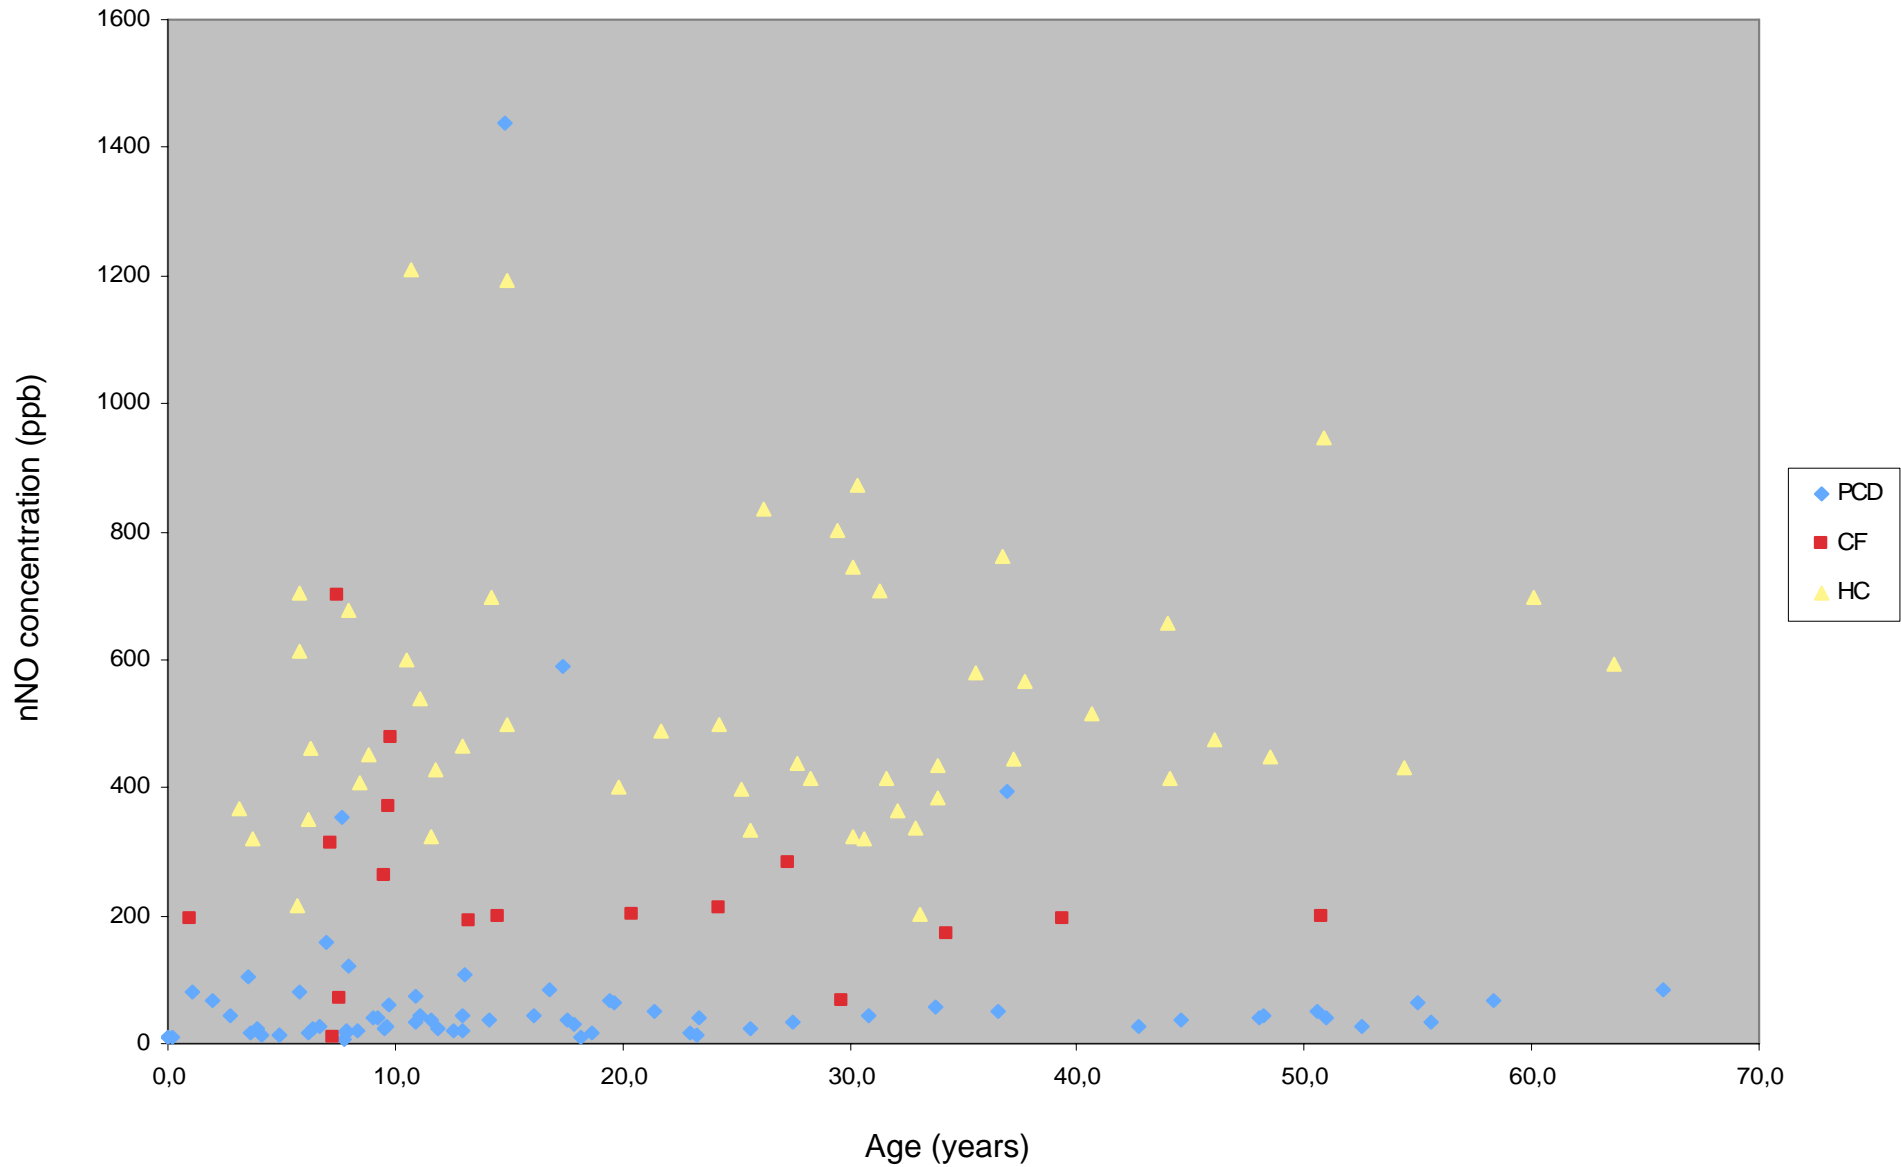

Supplement: Online_Figure_G.pdf [file Online_Figure_G.pdf]
